# Supplementary material for: Acylated Ghrelin Receptor Agonist HM01 Decreases Lean Body and Muscle Mass, but Unacylated Ghrelin Protects against Redox-Dependent Sarcopenia
Source: MDPI journal article supplement (doi:10.3390/antiox11122358), 2022-11-28
Supplement: s1 [file s1]

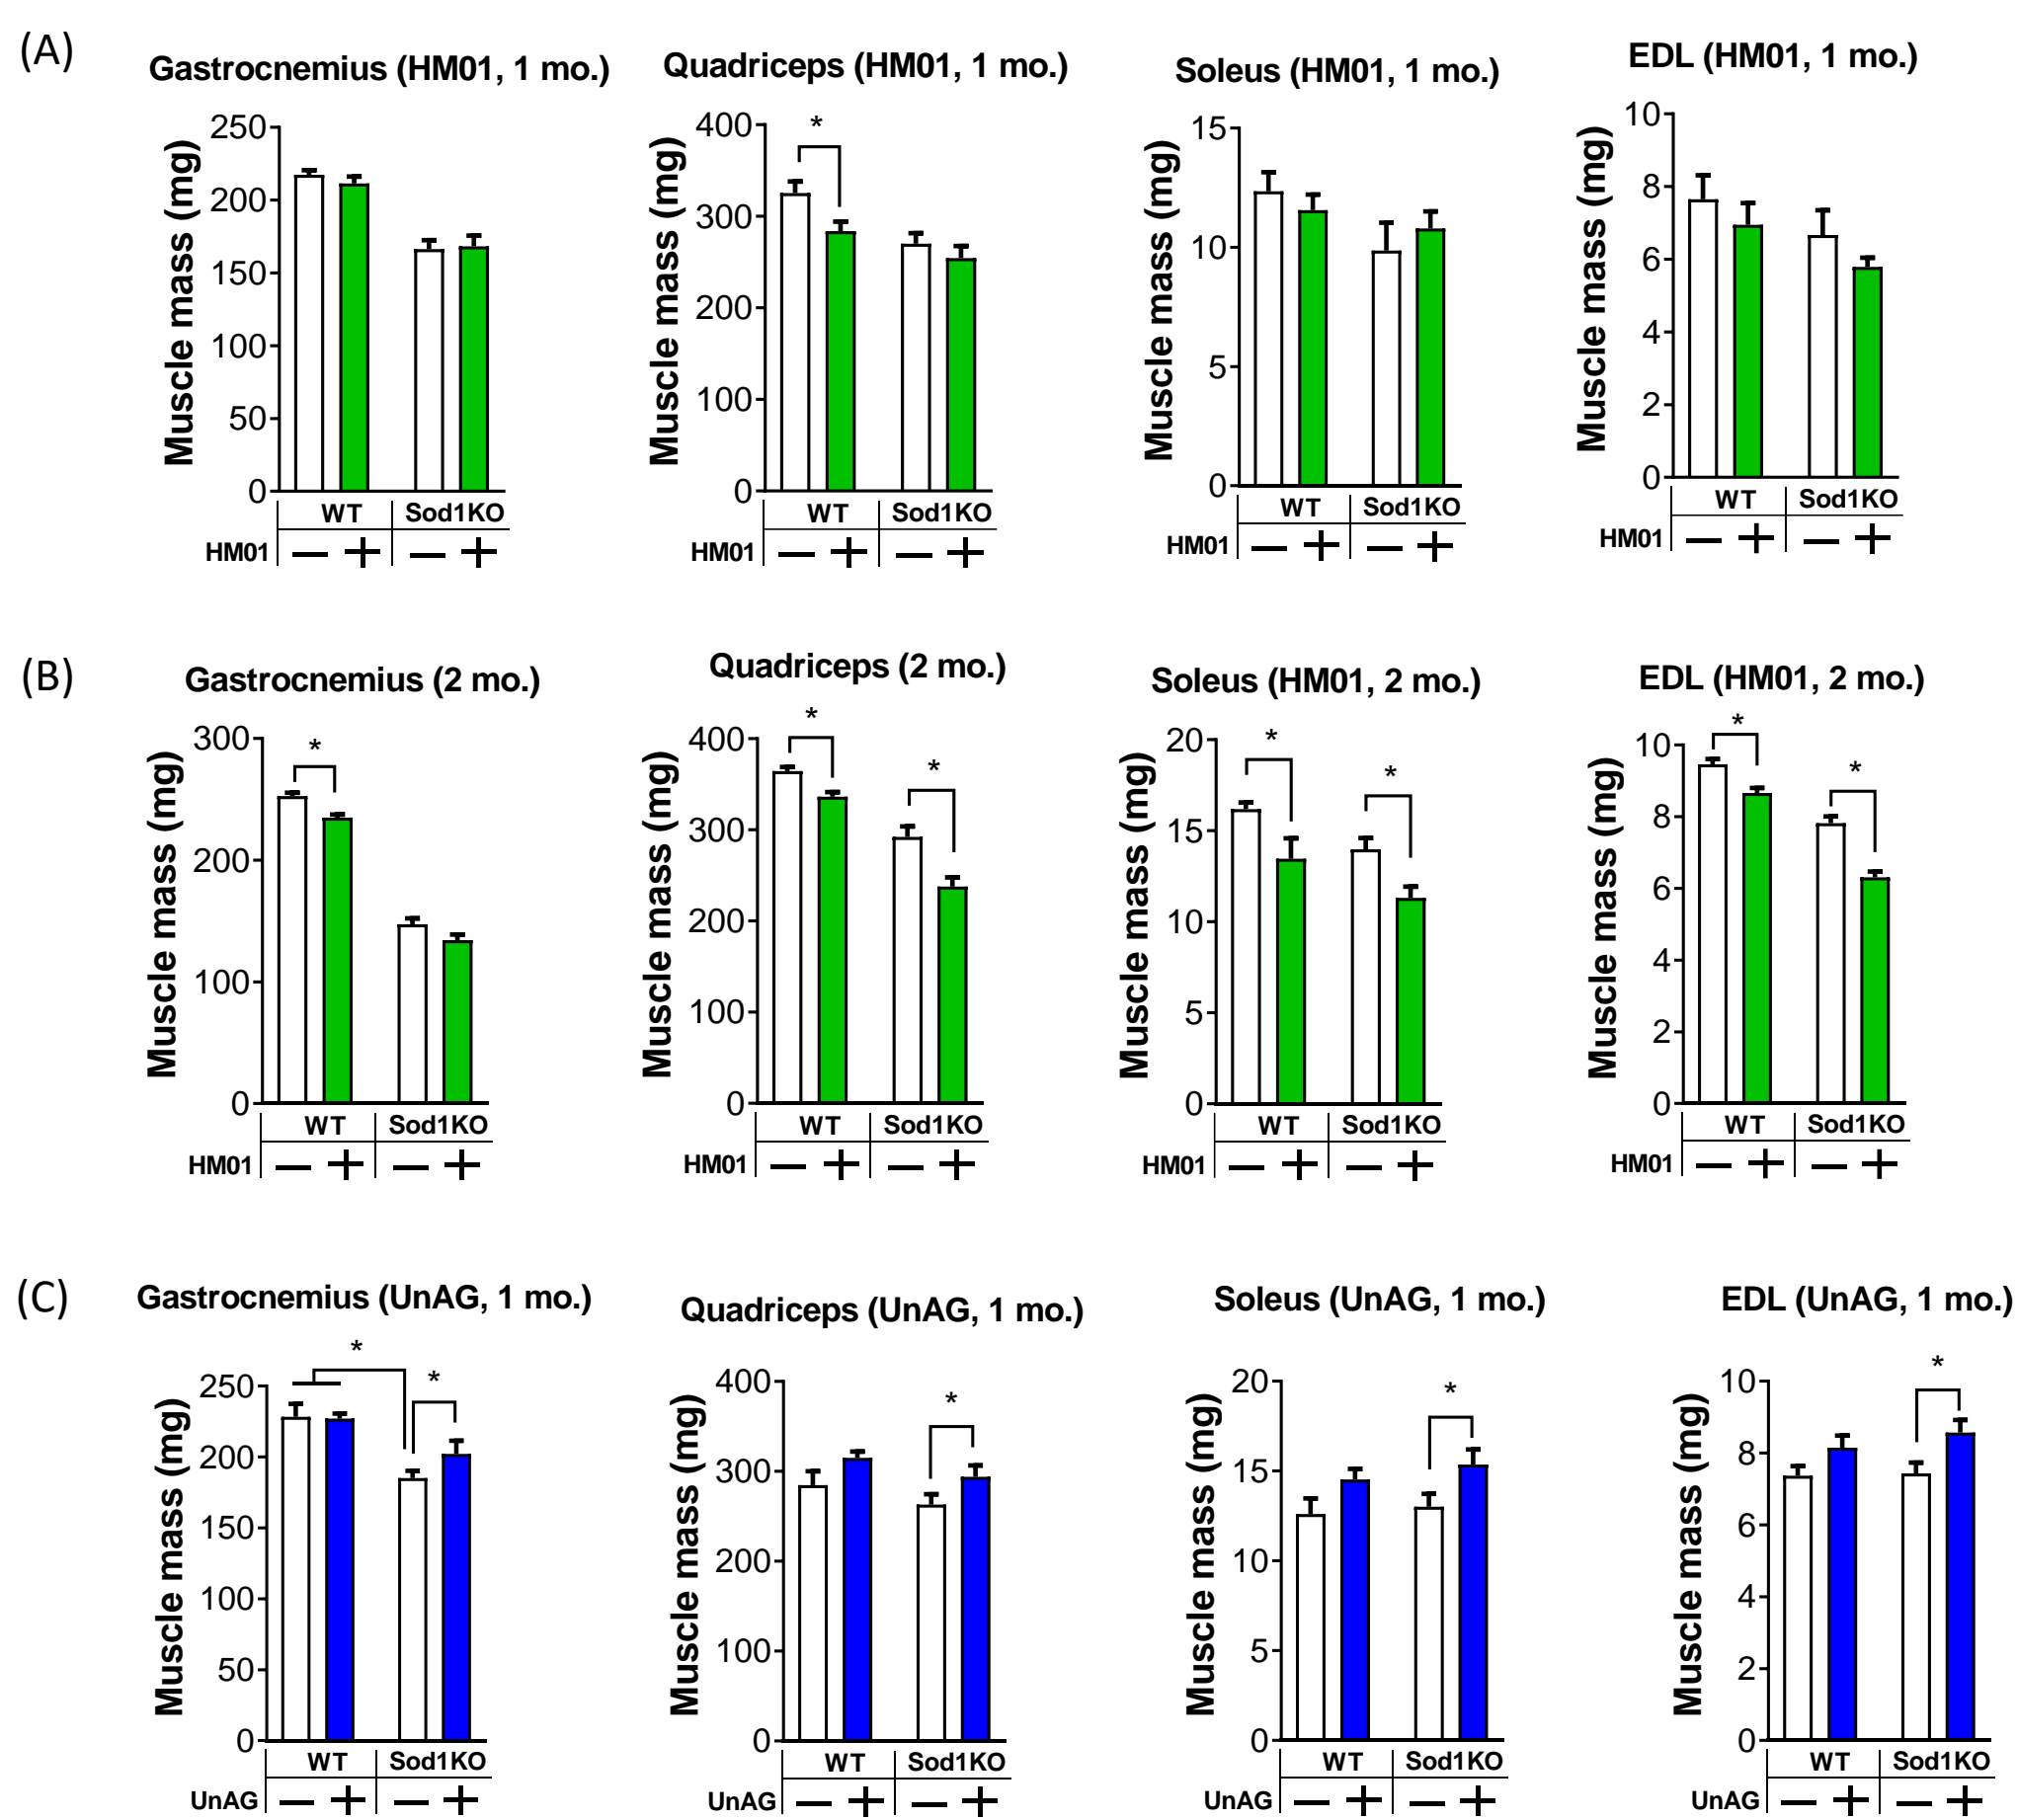

Figure S1. Skeletal muscle mass in mg tissue weights for HM01 (A, B) and unacylated ghrelin treated mice (C).

(A) HM01, 1mo

|      | WT    | WT-HM01 | Sod1KO | Sod1KO-HM01 |
|------|-------|---------|--------|-------------|
| Mean | 20.44 | 18.72   | 18.77  | 18.43       |
| SEM  | 1.64  | 0.68    | 2.85   | 1.28        |

No statistical differences were detected among groups.

(B) HM01, 2mo

|      | WT*   | WT-HM01 | Sod1KO | Sod1KO-HM01 |
|------|-------|---------|--------|-------------|
| Mean | 24.58 | 22.63   | 22.00  | 20.37       |
| SEM  | 1.42  | 2.45    | 1.59   | 1.10        |

\* WT was significantly different compared to Sod1KO and Sod1KO-HM01.

(C) Unacylated ghrelin, 1 mo

|      | WT    | WT-UnAG | Sod1KO | Sod1KO-UnAG |
|------|-------|---------|--------|-------------|
| Mean | 20.51 | 20.45   | 20.61  | 18.11       |
| SEM  | 1.23  | 0.56    | 1.97   | 1.19        |

No statistical differences were detected among groups.

Supplemental Table S1. Initial body weights for both HM01 and unacylated ghrelin treated animals.
